# Supplementary material
Source: ML conference proceedings conference paper supplement (https://openaccess.thecvf.com/content/CVPR2021/html/Luo_Intelligent_Carpet_Inferring_CVPR_2021_paper.html)
Supplement: Supplementary file 2 [file Luo_Intelligent_Carpet_Inferring_CVPR_2021_supplemental.zip]

Archive with 3 entries (3 files):
- 07231-supp/07231-supp.mp4
- 07231-supp/07231-supp.pdf
- 07231-supp/07231-supp.srt
