# Supplementary material
Source: ML conference proceedings conference paper supplement (https://openaccess.thecvf.com/content/CVPR2021/html/Luo_Intelligent_Carpet_Inferring_CVPR_2021_paper.html)
Supplement: Supplementary file 2 [file Luo_Intelligent_Carpet_Inferring_CVPR_2021_supplemental.zip › 07231-supp/07231-supp.srt]

1
00:00:00,000 --> 00:00:04,626
We introduce 3D human pose estimation from tactile signals.

2
00:00:04,902 --> 00:00:10,325
Daily human activities are guided by the tactile
interactions between human and the ground.

3
00:00:10,325 --> 00:00:14,303
Leveraging such interactions and using vision
as supervision, 

4
00:00:14,303 --> 00:00:17,610
we present a 3D human pose estimation approach

5
00:00:17,610 --> 00:00:21,689
using only the pressure maps recorded by 
a tactile sensing carpet.

6
00:00:22,720 --> 00:00:27,000
We first develop a high-density, large-scale
tactile sensing carpet, 

7
00:00:27,000 --> 00:00:30,876
spanning 36 sqrt feet with over 9,000 pressure sensors.

8
00:00:30,876 --> 00:00:36,668
Our system enables real-time recordings of
high-resolution human-ground tactile interactions.

9
00:00:36,668 --> 00:00:42,239
We collected over 2,000,000 synchronized tactile
and visual frames on 10 different individuals

10
00:00:42,239 --> 00:00:47,149
performing a diverse set of daily activities.
Due to the spatial correlation between the

11
00:00:47,149 --> 00:00:53,030
human skeleton and tactile signal over the
floor plane, we are able to perform data augmentation

12
00:00:53,030 --> 00:00:58,460
and synthesis by rotating, shifting, and combining
the recorded dataset.

13
00:00:58,460 --> 00:01:02,662
We capture visual data with 2 synchronized
and calibrated cameras. 

14
00:01:02,662 --> 00:01:09,350
In order to annotate the ground truth human pose in a scalable
manner, we leverage a state-of-the-art vision-based

15
00:01:09,350 --> 00:01:14,377
system, OpenPose, to generate 2D skeleton
from the RGB images. 

16
00:01:14,377 --> 00:01:21,544
We then triangulate the 2D skeleton and apply a 3D gaussian filterto generate the 3D keypoint confidence map.

17
00:01:22,575 --> 00:01:27,838
Employing the synchronized visual information
as supervision, our model takes in a sequence

18
00:01:27,838 --> 00:01:33,825
of tactile frames and outputs the 3D keypoint
confidence map for each of the 21 keypoints.

19
00:01:33,825 --> 00:01:35,912
Details can be found in our paper.

20
00:01:37,581 --> 00:01:43,049
Our model predicts the 3D human poses from
a diverse set of daily activities, including

21
00:01:43,049 --> 00:01:45,994
walking, sitting, lying, and exercising.

22
00:01:47,591 --> 00:01:52,132
The ground truth here is captured by the camera
and extracted by OpnePose, 

23
00:01:52,132 --> 00:01:57,612
while the prediction is generated from our model using 
only the tactile frames as input.

24
00:01:59,020 --> 00:02:03,751
Our predicted human pose smoothly transitions
along the corresponding trajectory, 

25
00:02:03,751 --> 00:02:07,358
with theaverage localization error less than 10 cm.

26
00:02:08,287 --> 00:02:11,603
The predictions do not rely on any visual information 

27
00:02:11,603 --> 00:02:16,870
and therefore,  are not affected by visual obstructions 
or a limited field of view,

28
00:02:16,870 --> 00:02:21,018
 which are common challenges in vision-based
human pose estimation.

29
00:02:57,180 --> 00:03:01,810
The predictions on upper body, especially
the arms, are generally less accurate than

30
00:03:01,810 --> 00:03:07,070
the ones on the lower body and the feet. This
agrees with our observation that the movement

31
00:03:07,070 --> 00:03:12,230
of arms or the upper body seldom affects the
force distributions on the foot pressure maps.

32
00:03:12,230 --> 00:03:17,400
Also, the model fails to predict the poses
where actions are performed without notable

33
00:03:17,400 --> 00:03:22,578
physical contact with the floor, for example.
free-floating feet during rolling.

34
00:03:23,899 --> 00:03:30,130
By applying a linear classifier on the tactile
feature map, our model also shows the capability

35
00:03:30,130 --> 00:03:36,520
to facilitate down-stream classification tasks.
Here, classification is performed on 10 actions,

36
00:03:36,520 --> 00:03:43,390
including squatting, bending, twisting, sit-up,
push-up, rolling, waist turning, stepping,

37
00:03:43,390 --> 00:03:45,492
lunging, and standing on toes.

38
00:03:46,101 --> 00:03:53,650
We further extend our model for multi-person
pose estimation. Using only the tactile information,

39
00:03:53,650 --> 00:03:59,790
our model localizes each individual and predicts
his or her 3D pose with a localization error

40
00:03:59,790 --> 00:04:01,986
less than 15 cm.

41
00:04:15,555 --> 00:04:22,099
In conclusion, we believe our work opens up
new opportunities for human pose estimation

42
00:04:22,099 --> 00:04:27,230
using a sensing modality that is different
and complementary to the vision system. It

43
00:04:27,230 --> 00:04:33,650
is unaffected by visual obstruction in a seamless
and confidential manner, with potential applications

44
00:04:33,650 --> 00:04:36,626
in smart homes, healthcare, and gaming.
